# Supplementary material for: Evaluation of storage period of fresh ginseng for quality improvement of dried and red processed varieties
Source: PubMed Central journal article supplement — J Ginseng Res. 2021 Jun 23;46(2):290–5. doi: 10.1016/j.jgr.2021.06.007 (PMC9058840; doi:10.1016/j.jgr.2021.06.007), 2021-06-23
Supplement: mmc3.pdf [file mmc3.pdf]

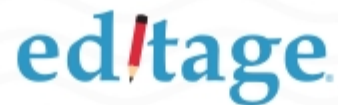

# Editing Certificate

This document certifies that the manuscript listed below has been edited to ensure language and grammar accuracy and is error free in these aspects. The edit was performed by professional editors at Editage, a division of Cactus Communications. The author's core research ideas were not altered in any way during the editing process. The quality of the edit has been guaranteed, with the assumption that our suggested changes have been accepted and the text has not been further altered without the knowledge of our editors.

#### MANUSCRIPT TITLE

**Evaluation of storage period of fresh ginseng for quality improvement of dried and red processed varieties**

#### AUTHORS

**Na Zhang, Xin Huang, Yun-Long Guo, Hao Yue, Chang-Bao Chen, and Shu-Ying Liu**

#### ISSUED ON

**June 08, 2021**

#### JOB CODE

**HWJSY\_1**

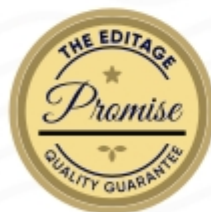

*Vikas Narang*

**Vikas Narang**  
Chief Operating Officer - Editage

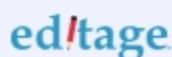

Editage, a brand of Cactus Communications, offers professional English language editing and publication support services to authors engaged in over 1300 areas of research. Through its community of experienced editors, which includes doctors, engineers, published scientists, and researchers with peer review experience, Editage has successfully helped authors get published in internationally reputed journals. Authors who work with Editage are guaranteed excellent language quality and timely delivery.

**GLOBAL :**  
(833) 979-0061 | [request@editage.com](mailto:request@editage.com)

**CHINA :**  
02158209795 | [fabiao@editage.com](mailto:fabiao@editage.com)

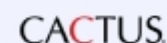

 [impact.science](https://www.impact.science)

 [researcher.life](https://www.researcher.life)

 [lifesciences.cactusglobal.com](https://www.lifesciences.cactusglobal.com)
